# Supplementary figures and images for: Dynamic control of adipose tissue development and adult tissue homeostasis by platelet-derived growth factor receptor alpha
Source: eLife journal article supplement (doi:10.7554/elife.56189), 2020-06-19

**A**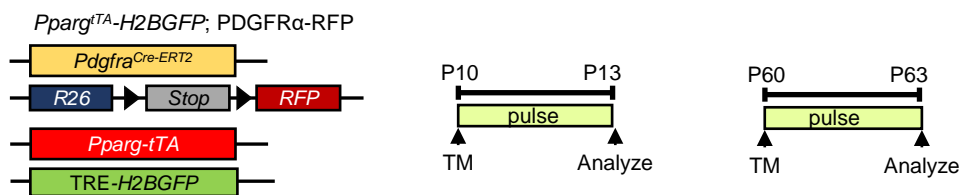**B**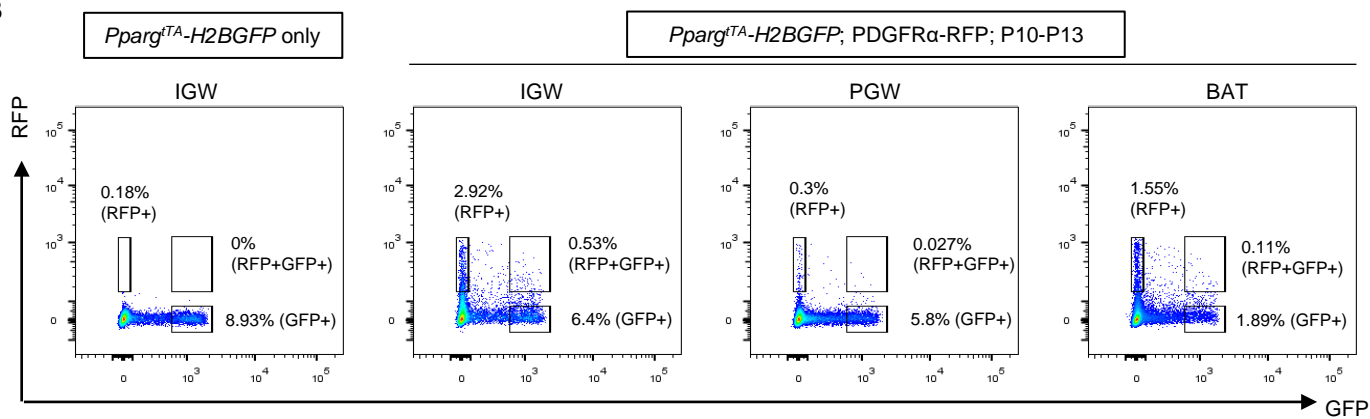**C**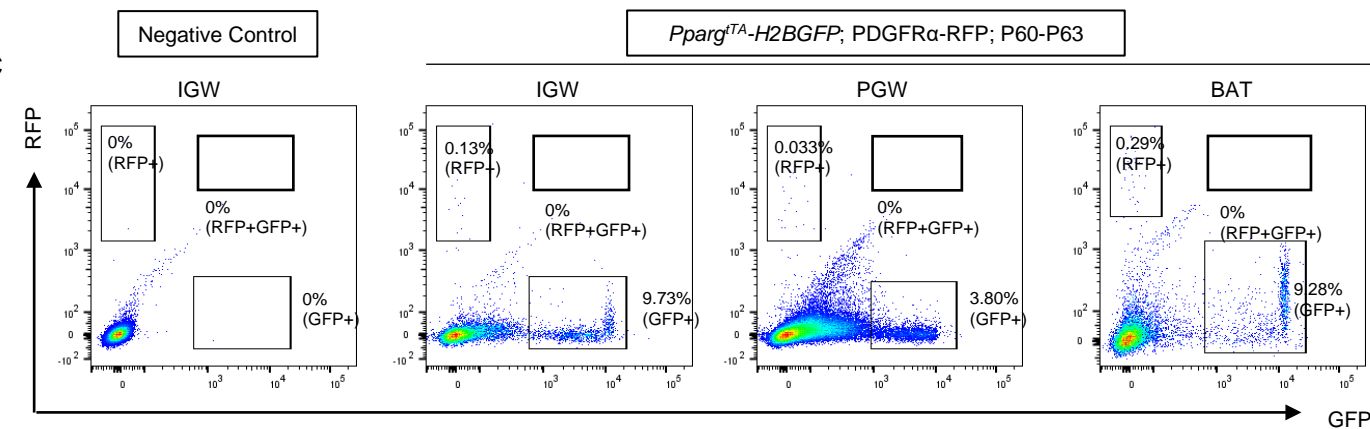

Supplement: supp [file elife-56189-supp-v1.zip]

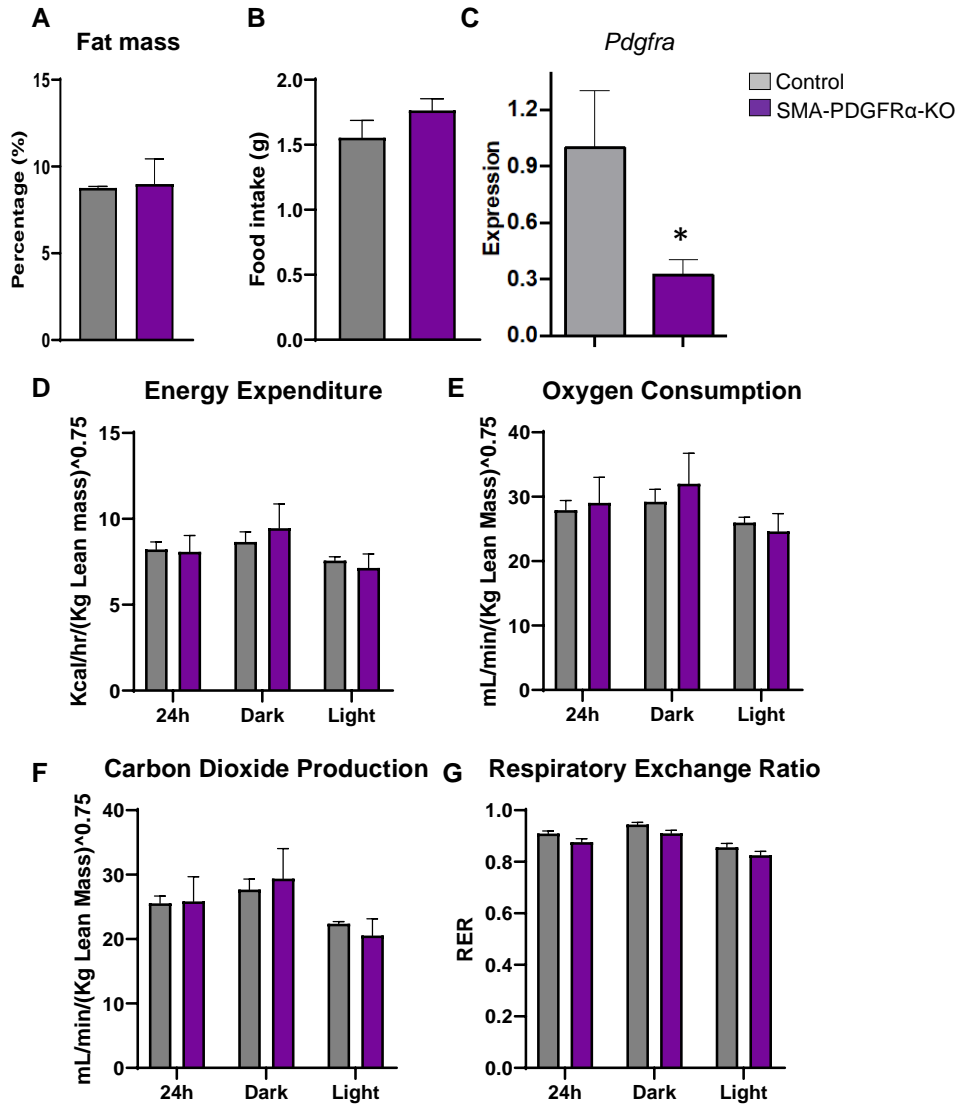

Supplement: supp [file elife-56189-supp-v1.zip]

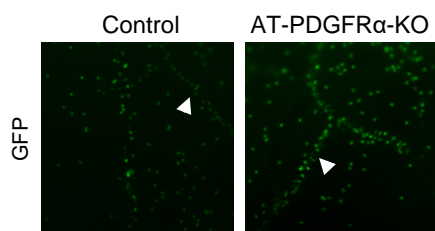

Supplement: supp [file elife-56189-supp-v1.zip]

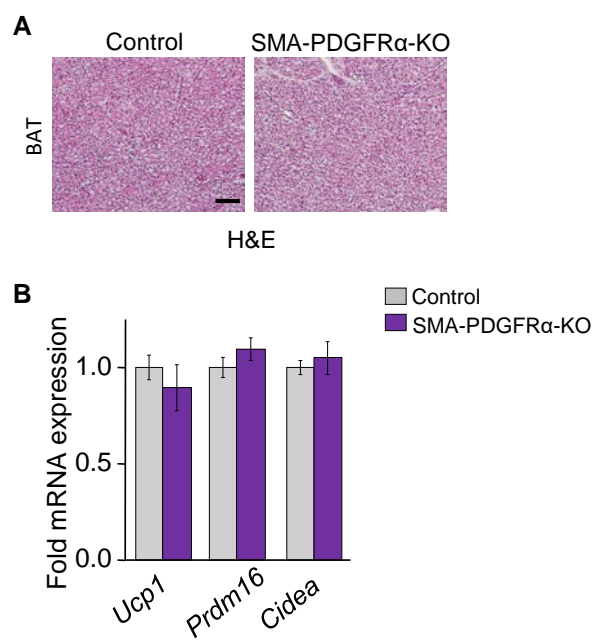

Supplement: supp [file elife-56189-supp-v1.zip]

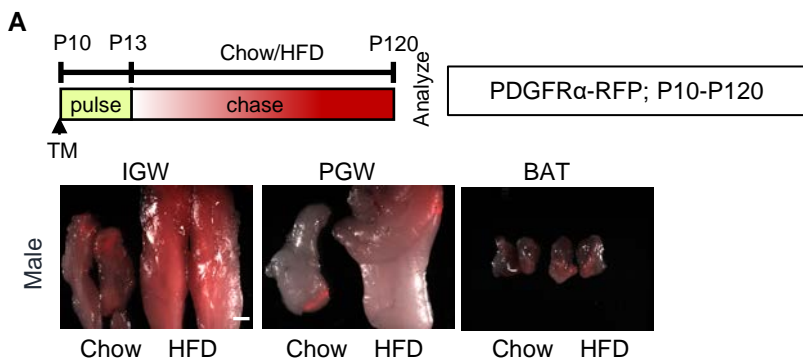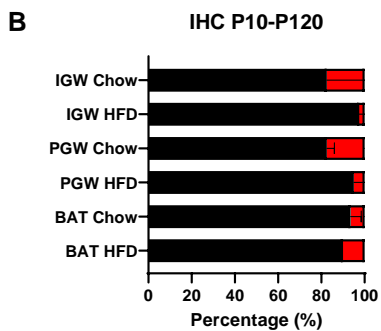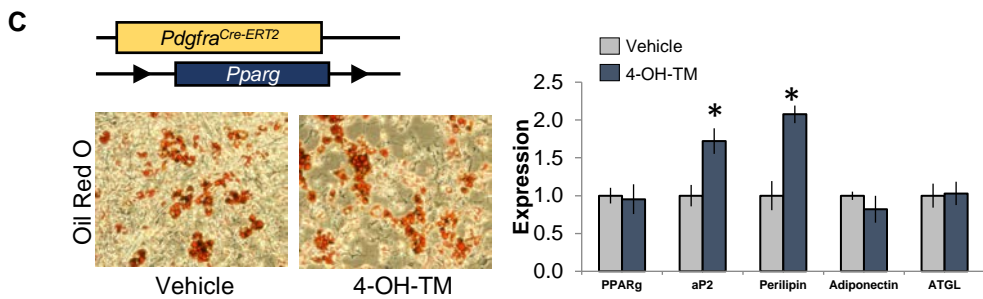

Supplement: supp [file elife-56189-supp-v1.zip]

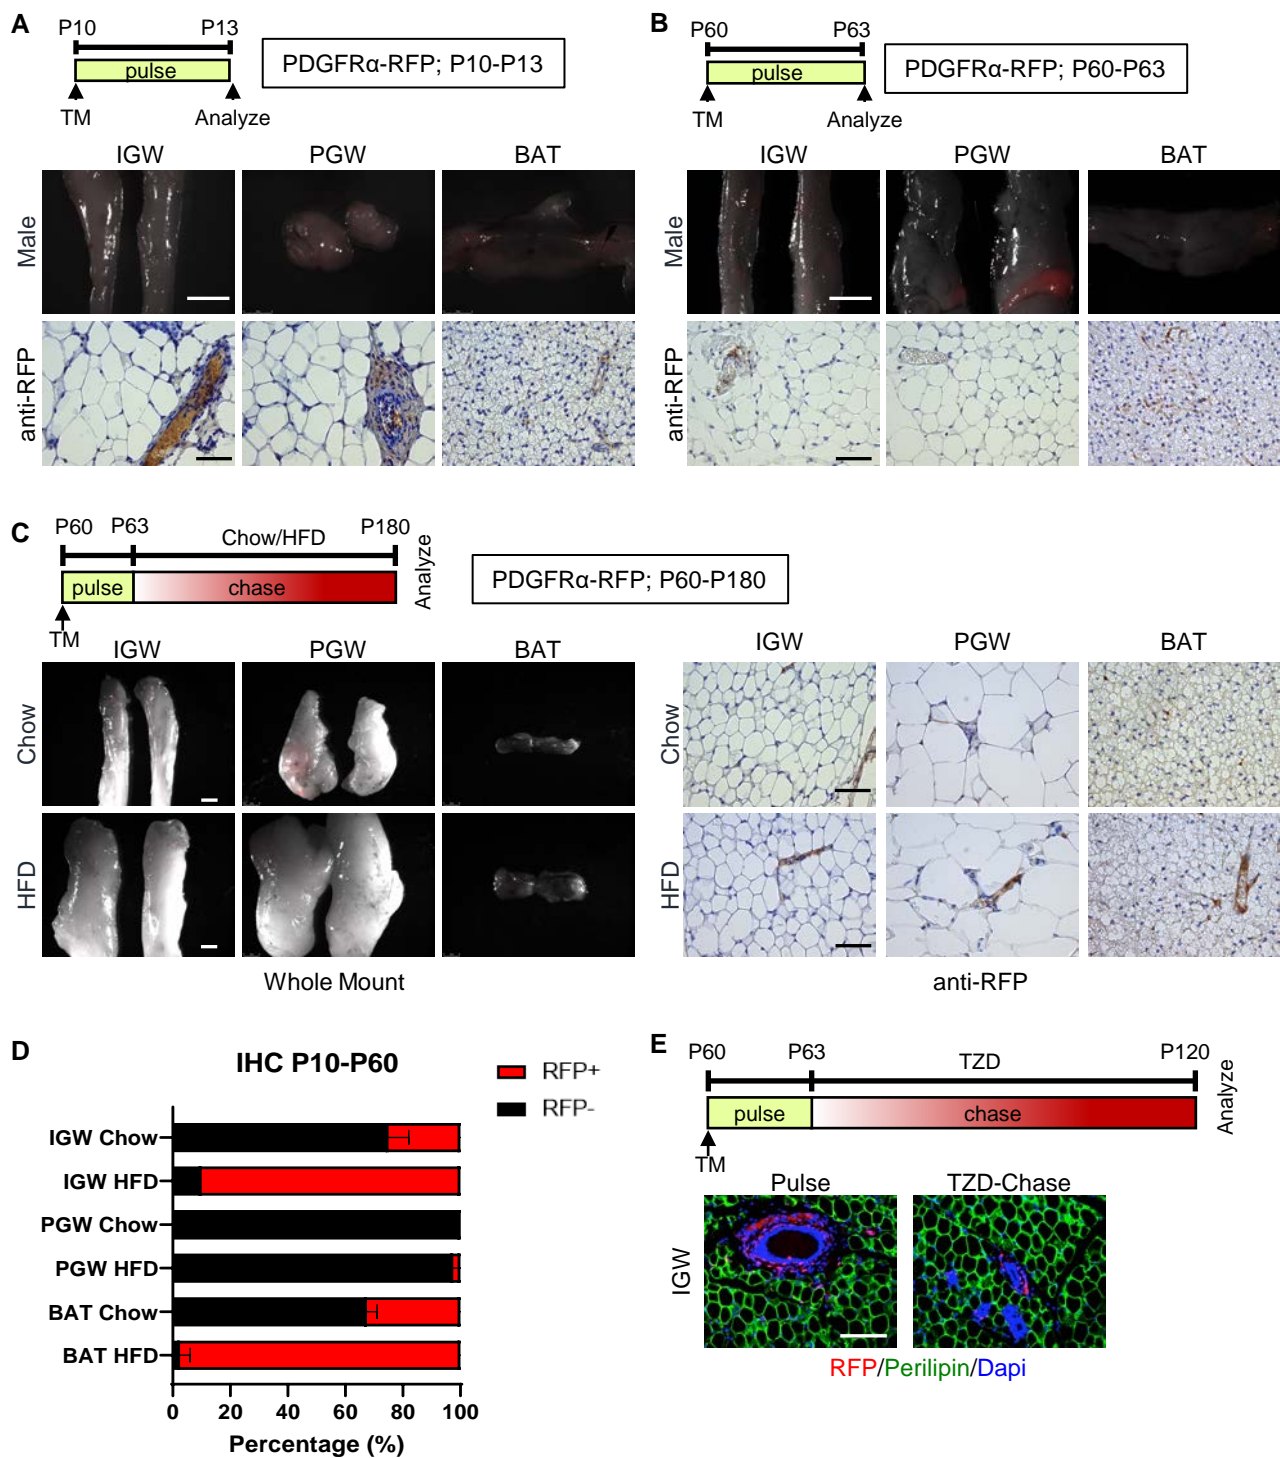

Supplement: supp [file elife-56189-supp-v1.zip]

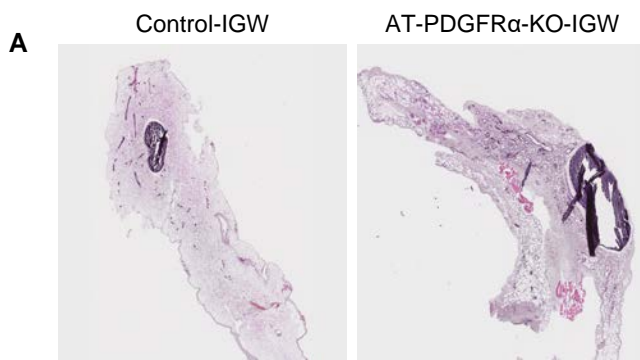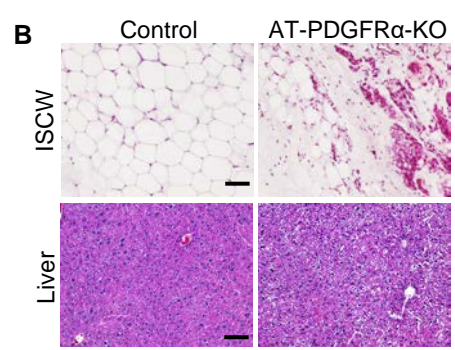

Supplement: supp [file elife-56189-supp-v1.zip]
